# Supplementary material for: Bending Fatigue Behaviour and Fatigue Endurance Limit Prediction of 20Cr2Ni4A Gear Steel after the Ultrasonic Surface Rolling Process
Source: MDPI journal article supplement (doi:10.3390/ma14102516), 2021-05-12
Supplement: s1 [file s1]

# Bending Fatigue Behaviour and Fatigue Endurance Limit Prediction of 20Cr2Ni4A Gear Steel after the Ultrasonic Surface Rolling Process

Zhiyuan Wang <sup>1,2</sup>, Yangfei Huang <sup>2</sup>, Zhiguo Xing <sup>2,\*</sup>, Haidou Wang <sup>2,3,\*</sup>, Debin Shan <sup>1</sup>, Fengkuan Xie <sup>2</sup> and Jiming Li <sup>2</sup>

<sup>1</sup> School of Materials Science and Engineering, Harbin Institute of Technology, Harbin 150001, China; reincarnational@163.com (Z.W.); shandeb@hit.edu.cn (D.S.)

<sup>2</sup> National Key Lab for Remanufacturing, Army Academy of Armored Forces, Beijing 100072, China; huangyanfei123@126.com (Y.H.); xiefengkuan@126.com (F.X.); lijim0215@163.com (J.L.)

<sup>3</sup> National Engineering Research Center for Remanufacturing, Army Academy of Armored Forces, Beijing 100072, China

\* Correspondence: xingzg2011@163.com (Z.X.); wanghaidou@aliyun.com (H.W.)

**Table S1.** Three-point bending fatigue test data of samples before and after USRP

| $\sigma_{\max}$ (MPa) | 1656   | 1422    | 1326    | 1230    | 1073    |
|-----------------------|--------|---------|---------|---------|---------|
| 0                     | -      | 77877   | 385963  | 776111  | 2569201 |
|                       | -      | 83608   | 160513  | 1361390 | 1596852 |
|                       | -      | 96475   | 202778  | 637711  | 2630210 |
|                       | -      | 93608   | 177928  | 1122622 | 3000000 |
|                       | -      | 65203   | 450625  | 856932  | 1256325 |
| 2                     | 89313  | 114793  | 401094  | 3652481 |         |
|                       | 87134  | 257816  | 778824  | 2852698 |         |
|                       | 55894  | 190647  | 689494  | 1265997 |         |
|                       | 65319  | 107713  | 303616  | 2235642 |         |
|                       | 74526  | 230962  | 419480  | 3000000 |         |
| 3                     | 155231 | 551367  | 610221  | 3000000 |         |
|                       | 211531 | 340512  | 1480729 | 1569862 |         |
|                       | 225541 | 332007  | 990242  | 1120229 |         |
|                       | 412689 | 613224  | 687198  | 899520  |         |
|                       | 112532 | 4340521 | 1526251 | 2569852 |         |
